# Supplementary material
Source: HighWire-hosted journal article supplement (https://tobaccocontrol.bmj.com/content/34/3/350)
Supplement: inline-supplementary-material-4 [file inline-supplementary-material-4.pdf]

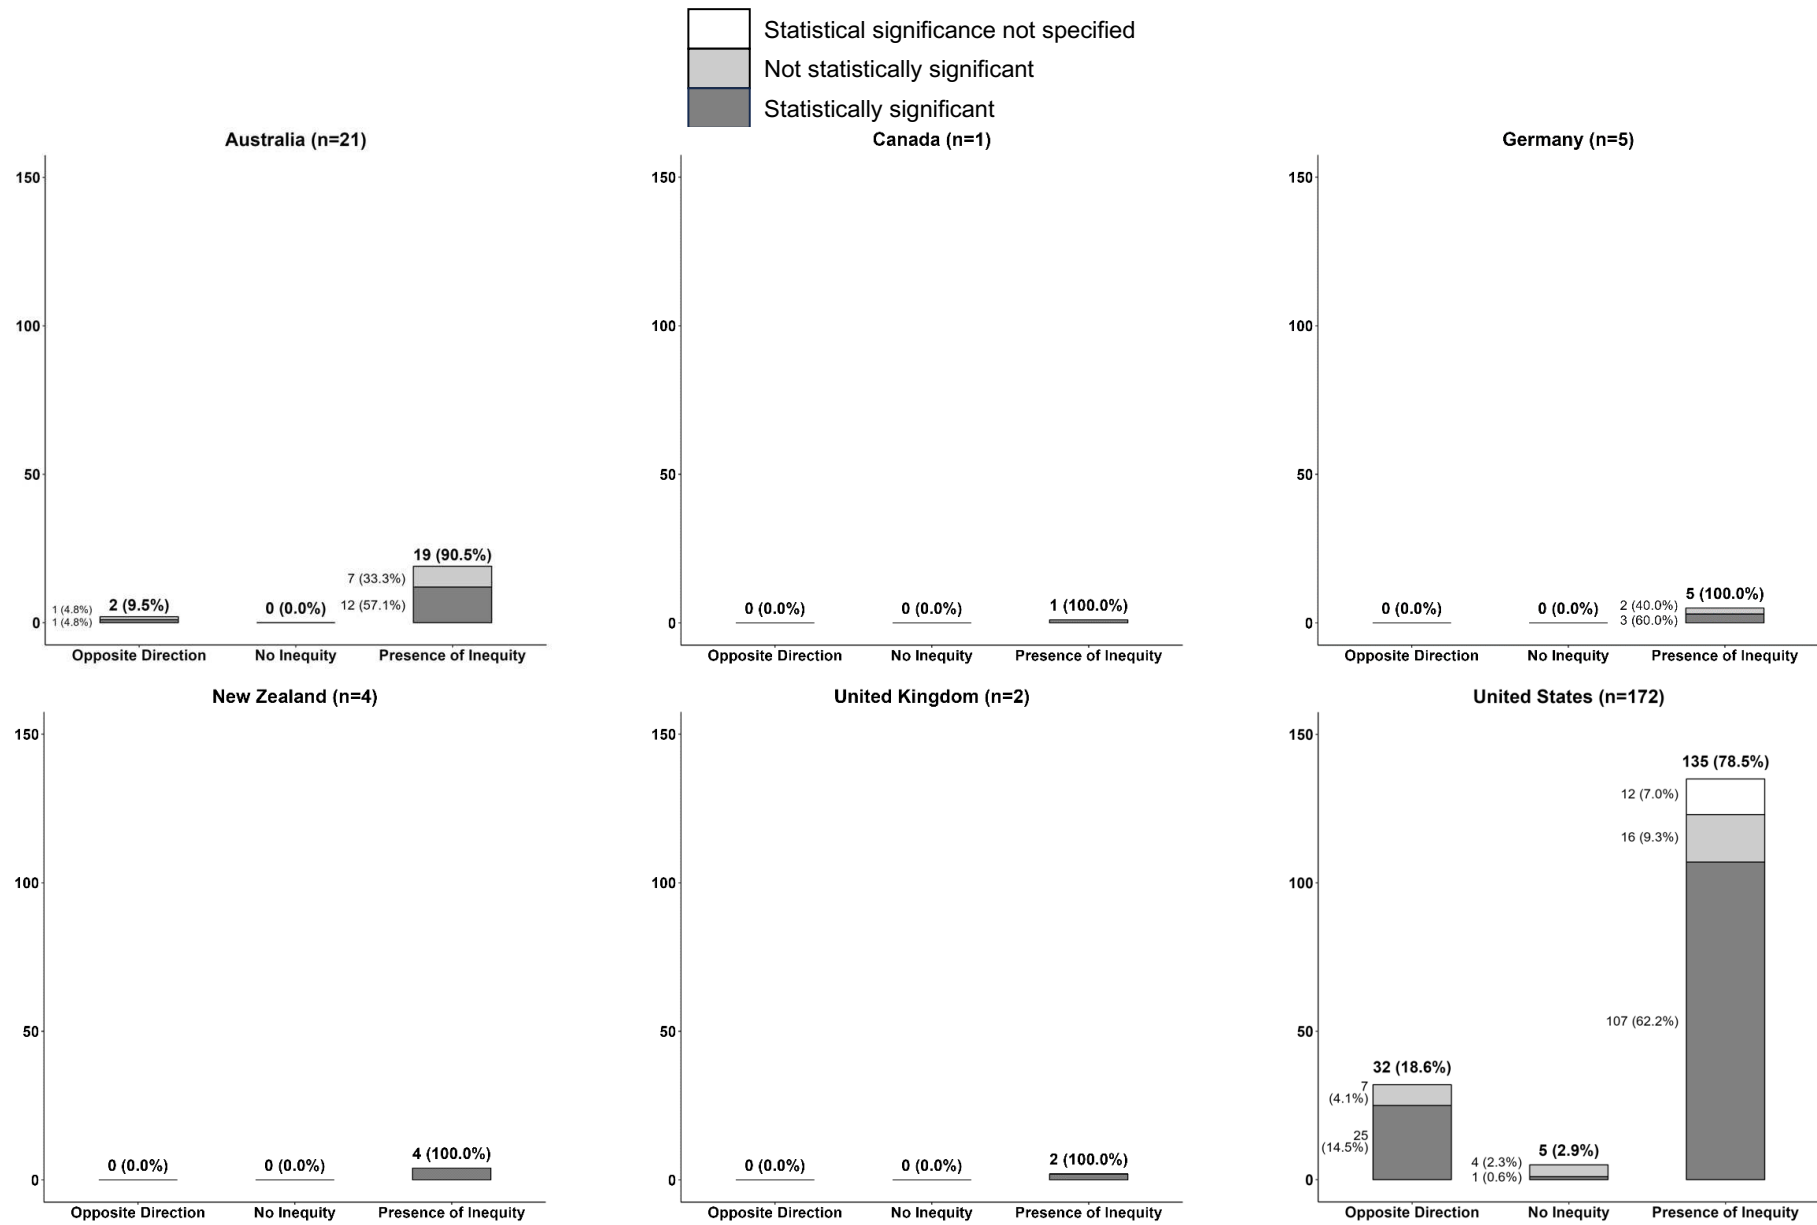

**Supplement D. Count and percentage of effect sizes by direction of association and country (n=205)**

**Note:** Opposite Direction indicates that the effect size was in the opposite direction expected for an inequity (e.g., greater tobacco retailer availability in higher-income neighborhoods); No Inequity indicates that the effect size was zero; Presence of Inequity indicates greater tobacco retailer availability in neighborhoods with a greater concentration of marginalized residents.
